# Supplementary material for: Identifying insects, clouds, and precipitation using vertically pointing polarimetric radar Doppler velocity spectra
Source: Copernicus journal article supplement (doi:10.5194/amt-14-4425-2021), 2021-06-16
Supplement: Supplementary file [file amt-14-4425-2021-supplement-title-page.pdf › amt-14-4425-2021-supplement-title-page.pdf]

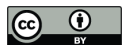

## *Supplement of*

# **Identifying insects, clouds, and precipitation using vertically pointing polarimetric radar Doppler velocity spectra**

**Christopher R. Williams et al.**

*Correspondence to:* Christopher R. Williams (christopher.williams@colorado.edu)

- amt-14-4425-2021-supplement-title-page.pdf
- Williams\_supplimental\_Material
  - Readme.txt
  - fig1\_sgp\_md\_3km\_CoXpol\_spc\_plot\_3km\_20180619\_20\_4700.png
  - fig1\_sgp\_md\_3km\_CoXpol\_spc\_plot\_3km\_20180619\_20\_4703.png
  - fig1\_sgp\_md\_3km\_CoXpol\_spc\_plot\_3km\_20180619\_20\_4707.png
  - fig1\_sgp\_md\_3km\_CoXpol\_spc\_plot\_3km\_20180619\_20\_4711.png
  - fig1\_sgp\_md\_3km\_CoXpol\_spc\_plot\_3km\_20180619\_20\_4714.png
  - fig1\_sgp\_md\_3km\_CoXpol\_spc\_plot\_3km\_20180619\_20\_4718.png
  - fig1\_sgp\_md\_3km\_CoXpol\_spc\_plot\_3km\_20180619\_20\_4722.png
  - fig1\_sgp\_md\_3km\_CoXpol\_spc\_plot\_3km\_20180619\_20\_4726.png
  - fig1\_sgp\_md\_3km\_CoXpol\_spc\_plot\_3km\_20180619\_20\_4729.png
  - fig1\_sgp\_md\_3km\_CoXpol\_spc\_plot\_3km\_20180619\_20\_4733.png
  - fig1\_sgp\_md\_3km\_CoXpol\_spc\_plot\_3km\_20180619\_20\_4737.png
  - fig1\_sgp\_md\_3km\_CoXpol\_spc\_plot\_3km\_20180619\_20\_4740.png
  - fig1\_sgp\_md\_3km\_CoXpol\_spc\_plot\_3km\_20180619\_20\_4744.png
  - fig1\_sgp\_md\_3km\_CoXpol\_spc\_plot\_3km\_20180619\_20\_4748.png
  - fig1\_sgp\_md\_3km\_CoXpol\_spc\_plot\_3km\_20180619\_20\_4751.png
  - fig1\_sgp\_md\_3km\_CoXpol\_spc\_plot\_3km\_20180619\_20\_4755.png
  - fig1\_sgp\_md\_3km\_CoXpol\_spc\_plot\_3km\_20180619\_20\_4759.png
  - fig1\_sgp\_md\_3km\_CoXpol\_spc\_plot\_3km\_20180731\_19\_1859.png
  - fig1\_sgp\_md\_3km\_CoXpol\_spc\_plot\_3km\_20180731\_19\_1902.png
  - fig1\_sgp\_md\_3km\_CoXpol\_spc\_plot\_3km\_20180731\_19\_1906.png
  - fig1\_sgp\_md\_3km\_CoXpol\_spc\_plot\_3km\_20180731\_19\_1910.png
  - fig1\_sgp\_md\_3km\_CoXpol\_spc\_plot\_3km\_20180731\_19\_1913.png

- [illegible]

[illegible]

[illegible]

- fig1\_sgp\_md\_3km\_CoXpol\_spc\_plot\_3km\_20190606\_08\_2552.png
- fig1\_sgp\_md\_3km\_CoXpol\_spc\_plot\_3km\_20190606\_08\_2556.png
- fig1\_sgp\_md\_3km\_CoXpol\_spc\_plot\_3km\_20190606\_08\_2559.png
- fig1\_sgp\_md\_3km\_CoXpol\_spc\_plot\_3km\_20190616\_22\_2758.png
- fig1\_sgp\_md\_3km\_CoXpol\_spc\_plot\_3km\_20190616\_22\_2802.png
- fig1\_sgp\_md\_3km\_CoXpol\_spc\_plot\_3km\_20190616\_22\_2805.png
- fig1\_sgp\_md\_3km\_CoXpol\_spc\_plot\_3km\_20190616\_22\_2809.png
- fig1\_sgp\_md\_3km\_CoXpol\_spc\_plot\_3km\_20190616\_22\_2813.png
- fig1\_sgp\_md\_3km\_CoXpol\_spc\_plot\_3km\_20190616\_22\_2816.png
- fig1\_sgp\_md\_3km\_CoXpol\_spc\_plot\_3km\_20190616\_22\_2820.png
- fig1\_sgp\_md\_3km\_CoXpol\_spc\_plot\_3km\_20190616\_22\_2824.png
- fig1\_sgp\_md\_3km\_CoXpol\_spc\_plot\_3km\_20190616\_22\_2828.png
- fig1\_sgp\_md\_3km\_CoXpol\_spc\_plot\_3km\_20190616\_22\_2831.png
- fig1\_sgp\_md\_3km\_CoXpol\_spc\_plot\_3km\_20190616\_22\_2835.png
- fig1\_sgp\_md\_3km\_CoXpol\_spc\_plot\_3km\_20190616\_22\_2839.png
- fig1\_sgp\_md\_3km\_CoXpol\_spc\_plot\_3km\_20190616\_22\_2842.png
- fig1\_sgp\_md\_3km\_CoXpol\_spc\_plot\_3km\_20190616\_22\_2846.png
- fig1\_sgp\_md\_3km\_CoXpol\_spc\_plot\_3km\_20190616\_22\_2850.png
- fig1\_sgp\_md\_3km\_CoXpol\_spc\_plot\_3km\_20190616\_22\_2853.png
- fig1\_sgp\_md\_3km\_CoXpol\_spc\_plot\_3km\_20190616\_22\_2857.png
- fig1\_sgp\_md\_3km\_CoXpol\_spc\_plot\_3km\_20190616\_22\_2901.png
- fig5\_sgp\_kazr\_ZHydroInsect\_v06\_COGS\_3km\_20180514\_16.tif
- fig5\_sgp\_kazr\_ZHydroInsect\_v06\_COGS\_3km\_20180514\_17.tif
- fig5\_sgp\_kazr\_ZHydroInsect\_v06\_COGS\_3km\_20180514\_18.tif
- fig5\_sgp\_kazr\_ZHydroInsect\_v06\_COGS\_3km\_20180514\_19.tif
- fig5\_sgp\_kazr\_ZHydroInsect\_v06\_COGS\_3km\_20180522\_15.tif
- fig5\_sgp\_kazr\_ZHydroInsect\_v06\_COGS\_3km\_20180522\_16.tif
- fig5\_sgp\_kazr\_ZHydroInsect\_v06\_COGS\_3km\_20180522\_17.tif
- fig5\_sgp\_kazr\_ZHydroInsect\_v06\_COGS\_3km\_20180522\_18.tif
- fig5\_sgp\_kazr\_ZHydroInsect\_v06\_COGS\_3km\_20180523\_16.tif
- fig5\_sgp\_kazr\_ZHydroInsect\_v06\_COGS\_3km\_20180523\_17.tif
- fig5\_sgp\_kazr\_ZHydroInsect\_v06\_COGS\_3km\_20180523\_18.tif
- fig5\_sgp\_kazr\_ZHydroInsect\_v06\_COGS\_3km\_20180523\_19.tif
- fig5\_sgp\_kazr\_ZHydroInsect\_v06\_COGS\_3km\_20180523\_20.tif
- fig5\_sgp\_kazr\_ZHydroInsect\_v06\_COGS\_3km\_20180523\_21.tif
- fig5\_sgp\_kazr\_ZHydroInsect\_v06\_COGS\_3km\_20180529\_17.tif
- fig5\_sgp\_kazr\_ZHydroInsect\_v06\_COGS\_3km\_20180529\_18.tif
- fig5\_sgp\_kazr\_ZHydroInsect\_v06\_COGS\_3km\_20180529\_19.tif
- fig5\_sgp\_kazr\_ZHydroInsect\_v06\_COGS\_3km\_20180529\_20.tif
- fig5\_sgp\_kazr\_ZHydroInsect\_v06\_COGS\_3km\_20180529\_21.tif
- fig5\_sgp\_kazr\_ZHydroInsect\_v06\_COGS\_3km\_20180529\_22.tif
- fig5\_sgp\_kazr\_ZHydroInsect\_v06\_COGS\_3km\_20180531\_16.tif

- [illegible]

- [illegible]

- [illegible]



- [illegible]

- fig5\_sgp\_kazr\_ZHydroInsect\_v06\_COGS\_3km\_20190701\_17.tif
- fig5\_sgp\_kazr\_ZHydroInsect\_v06\_COGS\_3km\_20190701\_18.tif
- fig5\_sgp\_kazr\_ZHydroInsect\_v06\_COGS\_3km\_20190701\_19.tif
- fig5\_sgp\_kazr\_ZHydroInsect\_v06\_COGS\_3km\_20190701\_20.tif
- fig5\_sgp\_kazr\_ZHydroInsect\_v06\_COGS\_3km\_20190701\_21.tif
- fig5\_sgp\_kazr\_ZHydroInsect\_v06\_COGS\_3km\_20190701\_22.tif
- fig5\_sgp\_kazr\_ZHydroInsect\_v06\_COGS\_3km\_20190704\_16.tif
- fig5\_sgp\_kazr\_ZHydroInsect\_v06\_COGS\_3km\_20190704\_17.tif
- fig5\_sgp\_kazr\_ZHydroInsect\_v06\_COGS\_3km\_20190704\_18.tif
- fig5\_sgp\_kazr\_ZHydroInsect\_v06\_COGS\_3km\_20190704\_19.tif
- fig5\_sgp\_kazr\_ZHydroInsect\_v06\_COGS\_3km\_20190704\_20.tif
- fig5\_sgp\_kazr\_ZHydroInsect\_v06\_COGS\_3km\_20190709\_21.tif
- fig5\_sgp\_kazr\_ZHydroInsect\_v06\_COGS\_3km\_20190709\_22.tif
- fig5\_sgp\_kazr\_ZHydroInsect\_v06\_COGS\_3km\_20190709\_23.tif
- fig5\_sgp\_kazr\_ZHydroInsect\_v06\_COGS\_3km\_20190714\_15.tif
- fig5\_sgp\_kazr\_ZHydroInsect\_v06\_COGS\_3km\_20190714\_16.tif
- fig5\_sgp\_kazr\_ZHydroInsect\_v06\_COGS\_3km\_20190714\_17.tif
- fig5\_sgp\_kazr\_ZHydroInsect\_v06\_COGS\_3km\_20190714\_18.tif
- fig5\_sgp\_kazr\_ZHydroInsect\_v06\_COGS\_3km\_20190714\_19.tif
- fig5\_sgp\_kazr\_ZHydroInsect\_v06\_COGS\_3km\_20190714\_20.tif
- fig5\_sgp\_kazr\_ZHydroInsect\_v06\_COGS\_3km\_20190714\_21.tif
- fig5\_sgp\_kazr\_ZHydroInsect\_v06\_COGS\_3km\_20190714\_22.tif
- fig5\_sgp\_kazr\_ZHydroInsect\_v06\_COGS\_3km\_20190714\_23.tif
- fig5\_sgp\_kazr\_ZHydroInsect\_v06\_COGS\_3km\_20190805\_15.tif
- fig5\_sgp\_kazr\_ZHydroInsect\_v06\_COGS\_3km\_20190805\_16.tif
- fig5\_sgp\_kazr\_ZHydroInsect\_v06\_COGS\_3km\_20190805\_17.tif
- fig5\_sgp\_kazr\_ZHydroInsect\_v06\_COGS\_3km\_20190805\_18.tif
- fig5\_sgp\_kazr\_ZHydroInsect\_v06\_COGS\_3km\_20190805\_19.tif
- fig5\_sgp\_kazr\_ZHydroInsect\_v06\_COGS\_3km\_20190805\_20.tif
- fig5\_sgp\_kazr\_ZHydroInsect\_v06\_COGS\_3km\_20190805\_21.tif
- fig5\_sgp\_kazr\_ZHydroInsect\_v06\_COGS\_3km\_20190929\_16.tif
- fig5\_sgp\_kazr\_ZHydroInsect\_v06\_COGS\_3km\_20190929\_17.tif
- fig5\_sgp\_kazr\_ZHydroInsect\_v06\_COGS\_3km\_20190929\_18.tif
- fig5\_sgp\_kazr\_ZHydroInsect\_v06\_COGS\_3km\_20190929\_19.tif
- fig5\_sgp\_kazr\_ZHydroInsect\_v06\_COGS\_3km\_20190929\_20.tif

The copyright of individual parts of the supplement might differ from the article licence.
